# Supplementary material
Source: PubMed Central journal article supplement (PMC6325180)
Supplement: dca9fddc0c74219b13fcf84859acf372_AAC.01754-18-s0001.pdf [file dca9fddc0c74219b13fcf84859acf372_AAC.01754-18-s0001.pdf]

## **SUPPLEMENTARY INFORMATION**

### **The Reaction Mechanism of Metallo- $\beta$ -lactamases is Tuned by the Conformation of an Active Site Mobile Loop**

Antonela R. Palacios, María F. Mojica, Estefanía Giannini, Magdalena A. Taracila,  
Christopher R. Bethel, Pedro M. Alzari, Lisandro H. Otero, Sebastián Klinke, Leticia I. Llarrull,  
Robert A. Bonomo and Alejandro J. Vila.

**Table S1.** Zn(II) Dissociation constants of NDM-1 and the L3 variants.  $K_{d1}$  and  $K_{d2}$  represent the macroscopic dissociation constants of the free enzyme and Zn(II) complex or the mono-metallated enzyme and Zn(II) complex, respectively.  $K_{d12}$  is the dissociation constant for the bi-metallated enzyme (L3Pro variant) or  $K_{d1} * K_{d2}$  product.

| Variant | Zn(II) dissociation constants |               |                               |
|---------|-------------------------------|---------------|-------------------------------|
|         | $K_{d1}$ (nM)                 | $K_{d2}$ (nM) | $K_{d1,2}$ (nM <sup>2</sup> ) |
| NDM-1   | 6 ± 4                         | 17 ± 6        | 100 ± 20                      |
| L3IMP   | 2.9 ± 0.7                     | 100 ± 10      | 290 ± 7                       |
| L3VIM   | 29 ± 6                        | 120 ± 20      | 3500 ± 100                    |
| L3Pro   |                               |               | 330 ± 90                      |

**Table S2.** Data collection and refinement statistics.

|                                            | <b>L3IMP</b>      |  | <b>L3Pro</b>       |                                    |
|--------------------------------------------|-------------------|--|--------------------|------------------------------------|
|                                            | <i>Native</i>     |  | <i>Native</i>      | Zn - edge                          |
| <b>PDB code</b>                            | <b>6C6I</b>       |  | <b>6CAC</b>        | -                                  |
| <b>Data Collection</b>                     |                   |  |                    |                                    |
| Synchrotron source                         | SOLEIL            |  | SOLEIL             | ESRF                               |
| Beamline                                   | Proxima 1         |  | Proxima 1          | ID23                               |
| Number of frames                           | 600               |  | 2500               | 2400                               |
| Oscillation step (°)                       | 0.2               |  | 0.1                | 0.15                               |
| Detector distance (mm)                     | 260.5             |  | 270.3              | 148.338                            |
| Wavelength (Å)                             | 0.97857           |  | 0.97934            | above = 1.27241<br>below = 1.28348 |
| Exposure per frame (s)                     | 0.4               |  | 0.1                | 0.037                              |
| <b>Indexing and Scaling</b>                |                   |  |                    |                                    |
| Cell parameters                            |                   |  |                    |                                    |
| a, b, c (Å)                                | 38.29 39.25 73.87 |  | 91.71 91.74 134.33 | 93.51 93.784 136.70                |
| $\alpha, \beta, \gamma$ (°)                | 90.89 93.10 90.02 |  | 90.00 107.16 90.00 | 90.00 106.90 90.00                 |
| Space group                                | <i>P1</i>         |  | <i>C2</i>          | <i>C2</i>                          |
| Resolution limit (Å)                       | 1.65              |  | 1.79               | 2.00                               |
| Number of total reflections                | 98791             |  | 451488             | 261904                             |
| Number of unique reflections               | 49940             |  | 96133              | 73935                              |
| Average multiplicity <sup>a</sup>          | 2.0 (2.0)         |  | 4.7 (4.2)          | 6.8 (5.9)                          |
| R <sub>meas</sub>                          | 0.141 (0.516)     |  | 0.074 (0.828)      | 0.056 (0.121)                      |
| I/ $\sigma$ (I)                            | 5.3 (2.1)         |  | 11.9 (1.9)         | 29.1 (15.4)                        |
| CC(1/2)                                    | 0.992 (0.787)     |  | 0.998 (0.817)      | 0.998 (0.992)                      |
| Completeness (%)                           | 96.6 (94.1)       |  | 97.0 (80.4)        | 97.1 (95.5)                        |
| Monomers per A.U.                          | 2                 |  | 4                  | 4                                  |
| Solvent content (%)                        | 45                |  | 54                 |                                    |
| B-factors (Wilson plot, Å <sup>2</sup> )   | 18                |  | 30                 |                                    |
| <b>Refinement</b>                          |                   |  |                    |                                    |
| Resolution range (Å)                       | 24.16 - 1.65      |  | 45.87 - 1.79       |                                    |
| No. of atoms                               |                   |  |                    |                                    |
| Protein                                    | 3396              |  | 6883               |                                    |
| Ligands/ions                               | 4                 |  | 66                 |                                    |
| Water                                      | 264               |  | 915                |                                    |
| R                                          | 0.203             |  | 0.163              |                                    |
| R <sub>free</sub>                          | 0.229             |  | 0.181              |                                    |
| rmsd values from ideal values <sup>b</sup> |                   |  |                    |                                    |
| Bond lengths (Å)                           | 0.010             |  | 0.010              |                                    |
| Bond angles (°)                            | 1.02              |  | 1.01               |                                    |
| B-factors (average, Å <sup>2</sup> )       | 20                |  | 36                 |                                    |
| <b>MolProbity validation<sup>c</sup></b>   |                   |  |                    |                                    |
| Clashscore                                 | 1.65              |  | 0.88               |                                    |
| Poor rotamers (%)                          | 2.03              |  | 0.57               |                                    |
| Ramachandran plot (%)                      |                   |  |                    |                                    |
| Favored                                    | 98.7              |  | 97.6               |                                    |
| Allowed                                    | 1.3               |  | 2.4                |                                    |
| Disallowed                                 | -                 |  | -                  |                                    |

<sup>a</sup> Values in parentheses correspond to the highest-resolution shell: L3IMP: 1.68-1.65; L3Pro: 1.83 - 1.79 Å. <sup>b</sup> (1). <sup>c</sup> (2)

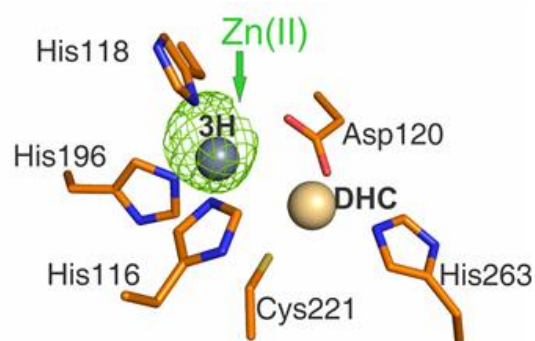

**Fig. S1.** Anomalous diffraction for Zn(II) in the active site of L3Pro. The presence of Zn(II) in the active site of L3Pro (PDB code: 6CAC) was verified by anomalous diffraction. Peaks of 40-50 rmsd (map in green at level 5) were observed in the 3H site of the four molecules of the asymmetric unit, whereas a signal was not detected at the DCH site.

## L3IMP

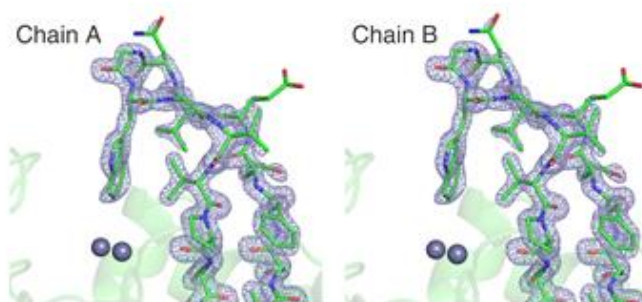

## L3Pro

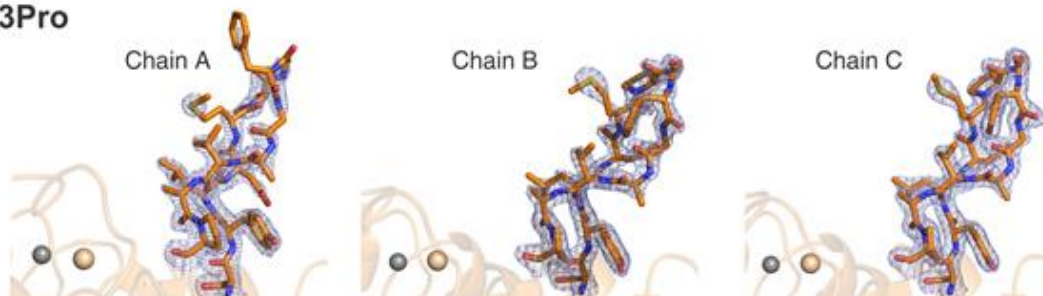

**Fig. S2.** Electron density of the loop L3 in L3IMP and L3Pro crystal structures. Electron density of loop L3 region of L3IMP (PDB code: 6C6I) and L3Pro (6CAC). Maps,  $2F_0-F_c$ , are shown at 1.5 rmsd. The loop L3 from chain D in L3Pro was not defined.

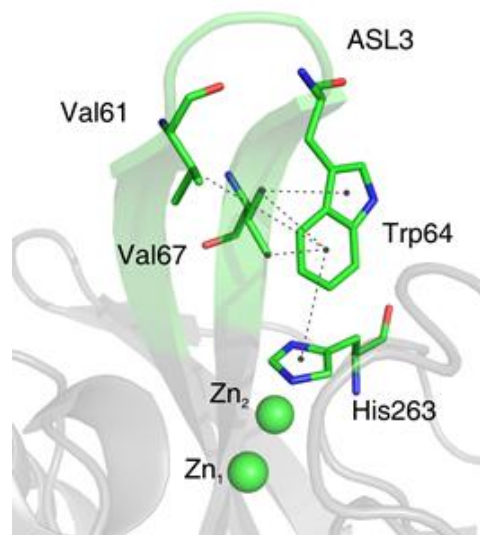

**Fig. S3.** Hydrophobic interactions that stabilize the Trp64 position in L3IMP. Crystal structure of L3IMP showing hydrophobic interactions of Trp64 with His263 ( $\pi$ - $\pi$  T shaped interaction), Val67 ( $\pi$ - $\sigma$  interactions) and Val61 ( $\pi$ -Alkyl interaction). The interactions were identified by Discovery Studio (3).

## References

1. Engh RA, Huber R. 1991. Accurate bond and angle parameters for X-ray protein structure refinement. *Acta Crystallographica Section A Foundations of Crystallography* 47:392-400.
2. Chen VB, Arendall WB, 3rd, Headd JJ, Keedy DA, Immormino RM, Kapral GJ, Murray LW, Richardson JS, Richardson DC. 2010. MolProbity: all-atom structure validation for macromolecular crystallography. *Acta Crystallogr D Biol Crystallogr* 66:12-21.
3. BIOVIA DS. 2017. Discovery Studio Modeling Environment, San Diego.
